# Supplementary material
Source: Springer Nature journal article supplement (https://www.springermedizin.de/resource/supplementary/12911_2012_552_MOESM2_ESM.pdf/9525812)

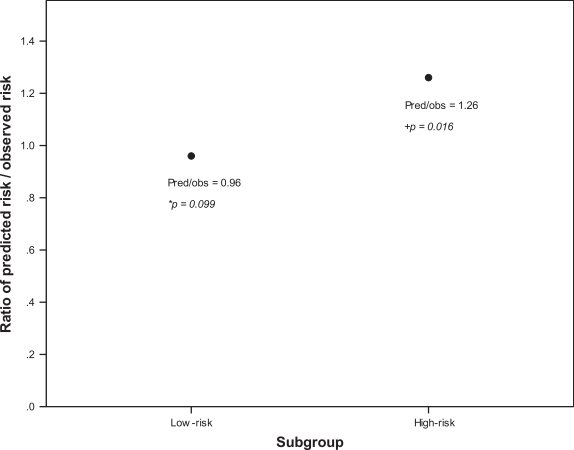

Supplement: MOESM2 [file 9525812]
